# Supplementary material
Source: Springer Nature journal article supplement (https://www.springermedizin.de/resource/supplementary/12889_2012_4224_MOESM1_ESM.pdf/9491838)

## Legend

+ Health posts

• Households

79min (41)\*

47min (20)

81min (42)

37min (18)

44min (17)

52min (24)

44min (17)

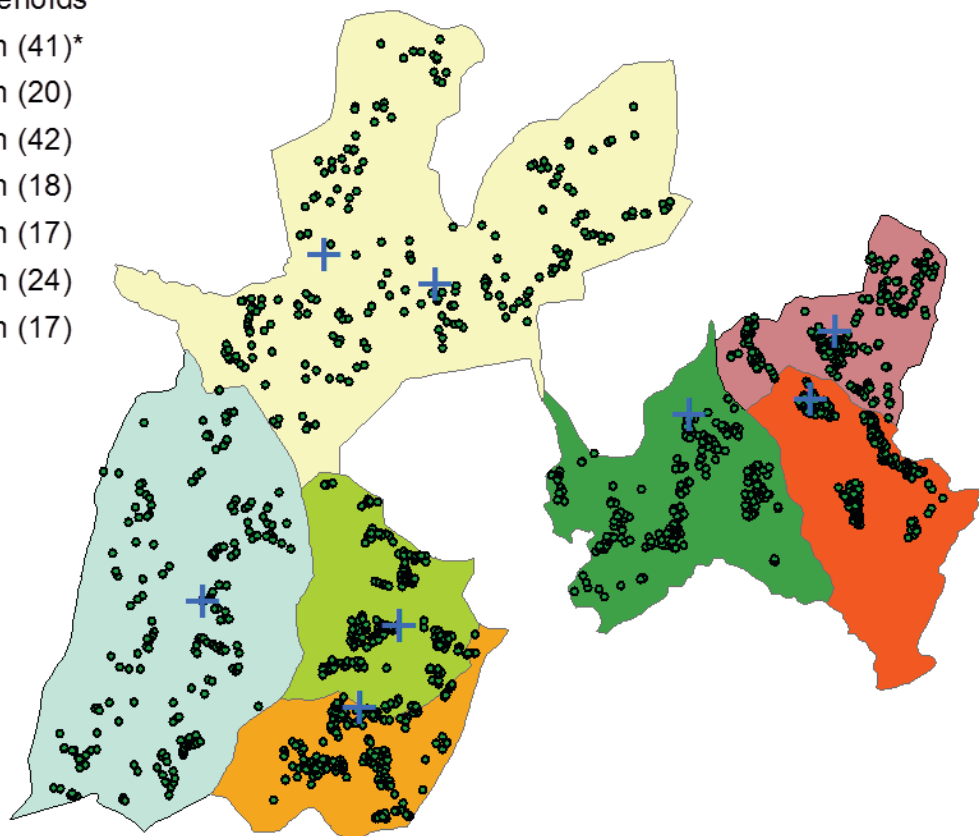

0 2.5 5 10 Kilometers

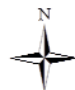

Supplement: MOESM1 [file 9491838]
